# Supplementary material for: Longin R-SNARE is retrieved from the plasma membrane by ANTH domain-containing proteins in Arabidopsis
Source: PubMed Central journal article supplement — Proc Natl Acad Sci U S A. 2020 Sep 23;117(40):25150–8. doi: 10.1073/pnas.2011152117 (PMC7547277; doi:10.1073/pnas.2011152117), 2020-09-23
Supplement: pnas.2011152117.sapp.pdf [file pnas.2011152117.sapp.pdf]

# PNAS

[www.pnas.org](http://www.pnas.org)

Supplementary Information for

**Longin R-SNARE is retrieved from the plasma membrane by ANTH domain-containing proteins in *Arabidopsis***

Masaru Fujimoto, Kazuo Ebine, Kohji Nishimura, Nobuhiro Tsutsumi, and Takashi Ueda

Takashi Ueda  
Email: [tueda@nibb.ac.jp](mailto:tueda@nibb.ac.jp)

**This PDF file includes:**

Figures S1 to S7  
Table S1

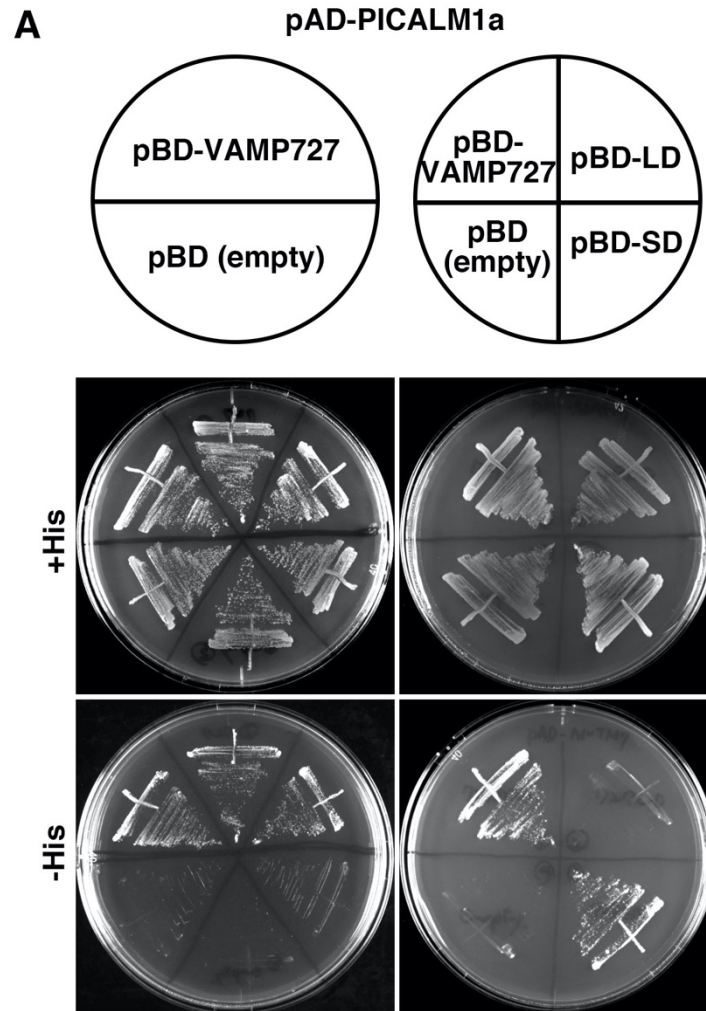

**Fig. S1. PICALM1a interacts with the SNARE domain of VAMP727.** (A) PICALM1a was expressed as a fusion protein with a transcriptional activation domain (pAD), and the cytoplasmic domain (left) or the longin (LD) or SNARE domain (SD) (right) of VAMP727 was expressed as a fusion protein with the DNA-binding domain (pBD). Interactions between two proteins were tested using the *HIS3* reporter gene.

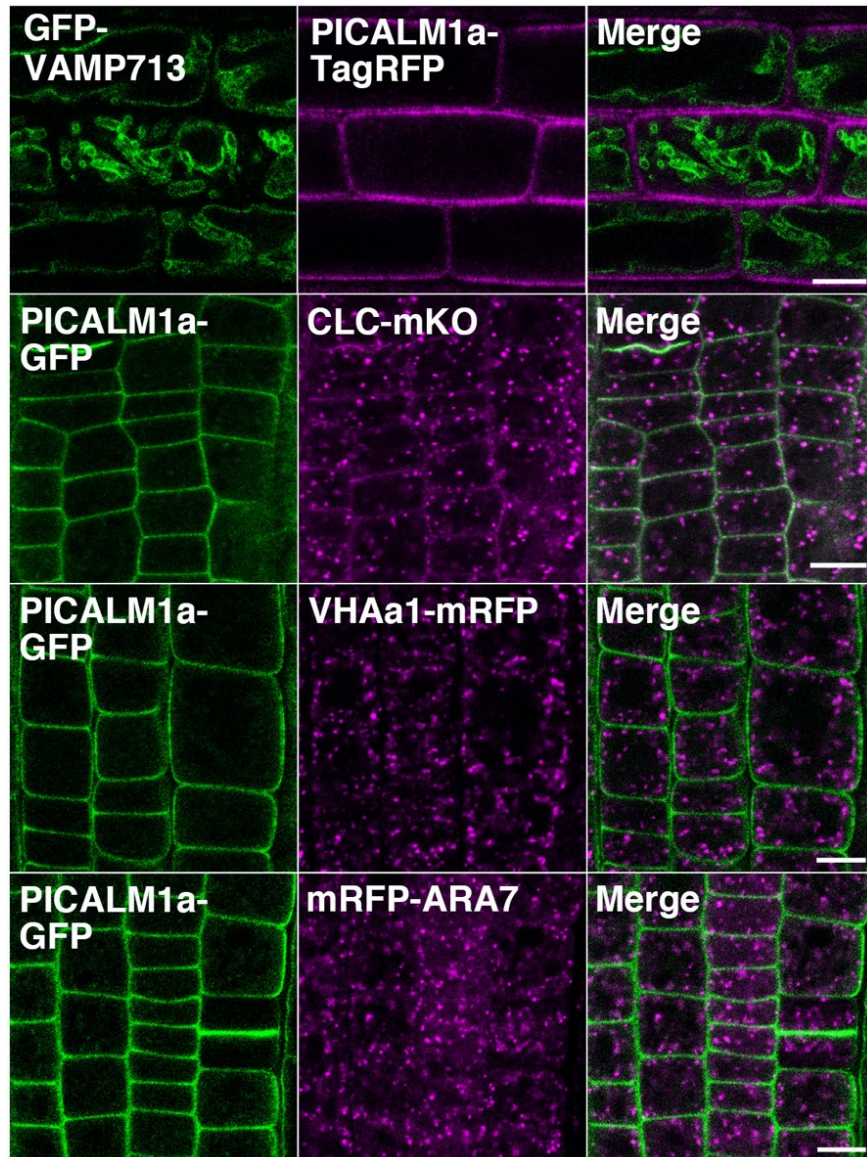

**Fig. S2. Comparison of subcellular localization between PICALM1a and organelle markers.** The subcellular localization was compared between fluorescently tagged PICALM1a and GFP-VAMP713 (vacuolar membrane), CLC-mKO, VHAa1-mRFP (TGN), or mRFP-ARA7 (multivesicular bodies) in root epidermal cells of 7-day-old plants by confocal microscopy. Scale bars = 10  $\mu$ m.

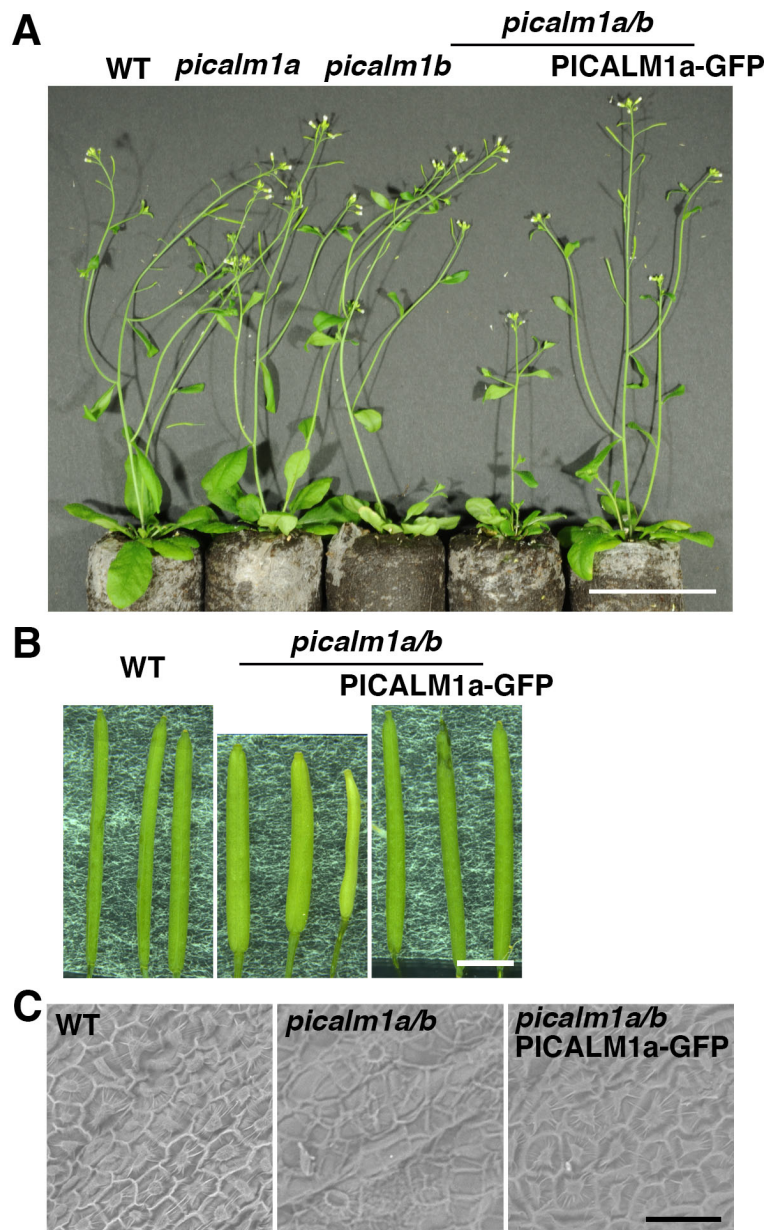

**Figure S3. *picalm1* mutants exhibit semi-dwarfism.** (A) Forty-day-old *Arabidopsis* plants of wild-type (WT), *picalm1a* and *picalm1b* single mutants, *picalm1a picalm1b* (*picalm1a/b*) double mutant, and double mutant transformed with *PICALM1a-GFP*. (B) Siliques collected from the plants with the indicated genotypes. (C) Images of mucilage secretory cells in the seed coat of dry seeds with indicated genotypes. Scale bars = 5 cm (A), 3 mm (B), or 50  $\mu$ m (C).

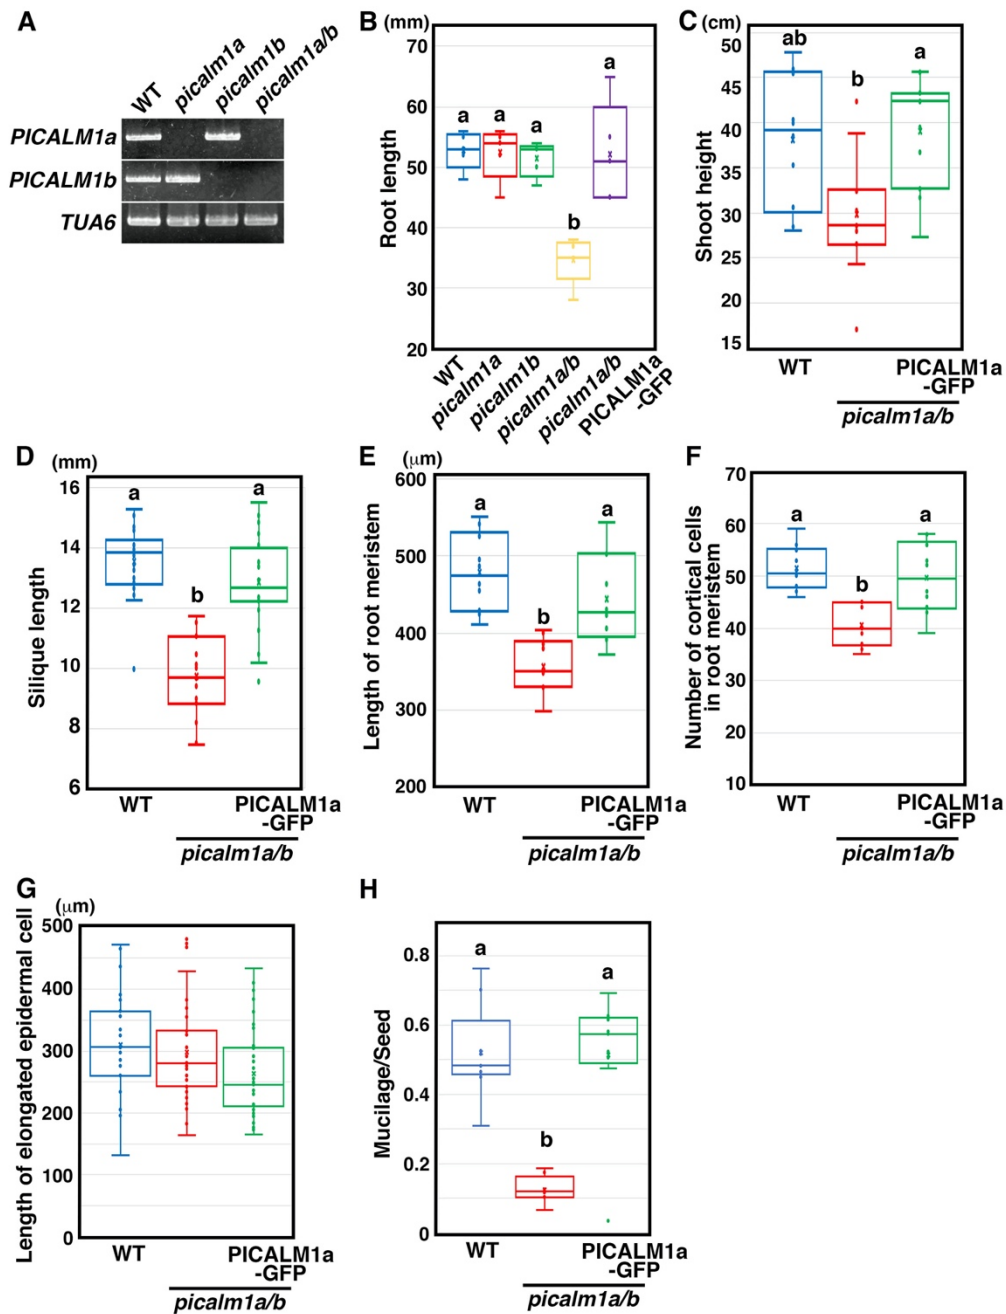

**Figure S4. Characterization of *picalm1* mutants.** (A) Expression analysis of the *PICALM1* genes by RT-PCR in wild-type and *picalm1* mutant plants. (B) Quantification of root length of 10-day-old *Arabidopsis* seedlings with the indicated genotypes grown on 1/2 MS agar medium. One-way ANOVA followed by Tukey's HSD post-hoc test was used for statistical analyses (n = 5 seedlings). (C) Quantification of the height of fully grown plants with the indicated genotypes. One-way ANOVA followed by Steel–Dwass test was used for statistical analyses (n = 10 plants for WT and 11 plants for *picalm1a/b* and *picalm1a/b* with *PICALM1a-GFP*). (D) Quantification of the length of siliques collected from *Arabidopsis* plants with the indicated genotypes. One-way

ANOVA followed by Steel–Dwass test was used for statistical analysis (n = 9 siliques for WT and *picalm1a/b* and 12 siliques for *picalm1a/b* with *PICALM1a-GFP*). (E and F) Quantification of the meristem length of roots (E) and number of cortical cells in the root meristem (F) of 6-day-old *Arabidopsis* seedlings with the indicated genotypes grown on 1/2 MS agar medium. One-way ANOVA followed by Steel–Dwass test was used for statistical analysis (n = 10 roots for each genotype). (G) Quantification of the length of fully elongated epidermal cells without a root hair of 6-day-old *Arabidopsis* seedlings with the indicated genotypes grown on 1/2 MS agar medium. Significant difference was not detected among the three groups by the one-way ANOVA. (n = 23 cells for WT, 31 cells for *picalm1a/b*, and 34 cells for *picalm1a/b* with *PICALM1a-GFP* for G) (H) Ratio of the area of mucilage to the seed calculated from images of ruthenium red-stained imbibed seeds with the indicated genotypes. One-way ANOVA followed by Steel–Dwass test was used for statistical analysis (n = 9 seeds for WT, 8 seeds for *picalm1a/b*, and 9 seeds for *picalm1a/b* with *PICALM1a-GFP*).

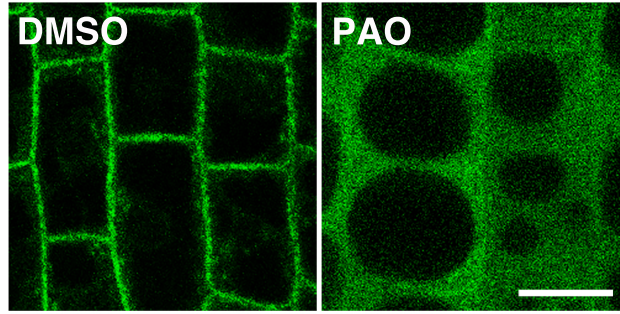

**Fig. S5. Effect of phenylarsine oxide (PAO) on PICALM1a-GFP localization.** Confocal images of root epidermal cells of 7-day-old *Arabidopsis* plants expressing PICALM1a-GFP treated with DMSO or PAO.

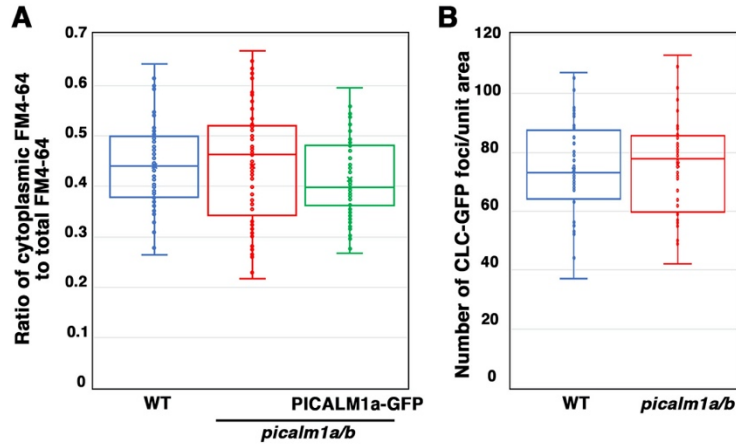

**Fig. S6. *picalm1a/b* mutation does not considerably affect general endocytosis.** (A)

Quantification of the ratio of internalized to total fluorescence from FM4-64 in root epidermal cells of *Arabidopsis* with the indicated genotypes.  $n = 51$  cells in 5 plants for wild type (WT), 81 cells in 8 plants for *picalm1a/b*, and 66 cells in 6 plants for *picalm1a/b* complemented with PICALM1a-GFP. Significant difference was not detected among the three groups by the one-way ANOVA.

(B) The number of CLC-GFP foci in  $100 \mu\text{m}^2$  of PM areas in the root epidermal cells of wild-type (WT) and *picalm1a/b* mutant plants observed by VIAFM.  $n = 44$  unit areas in 4 plants for wild type (WT) and 36 unit areas in 4 plants for *picalm1a/b*. Significant difference was not detected using Wilcoxon rank sum test.



Fig 1C,  $\alpha$ His

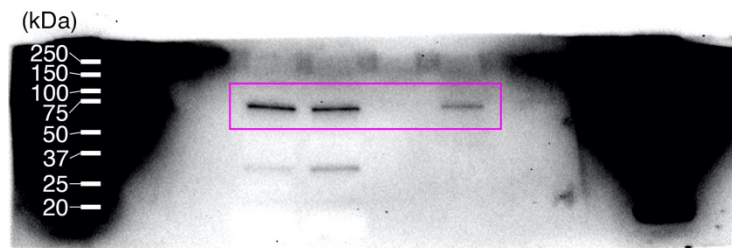

Fig 1C,  $\alpha$ GFP

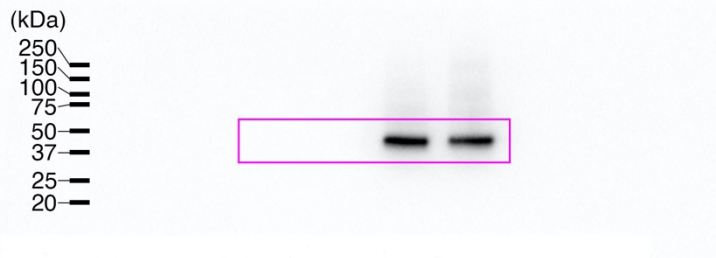

Fig 1D,  $\alpha$ CHC

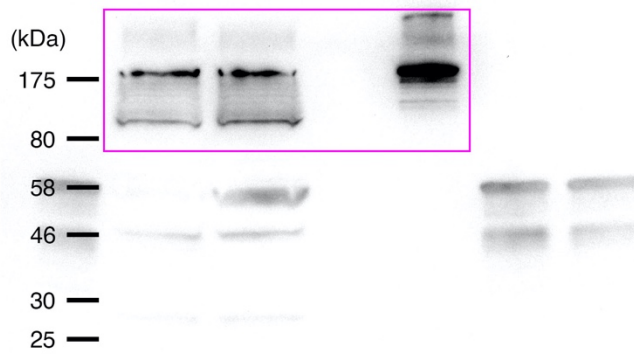

Fig 1D,  $\alpha$ GFP

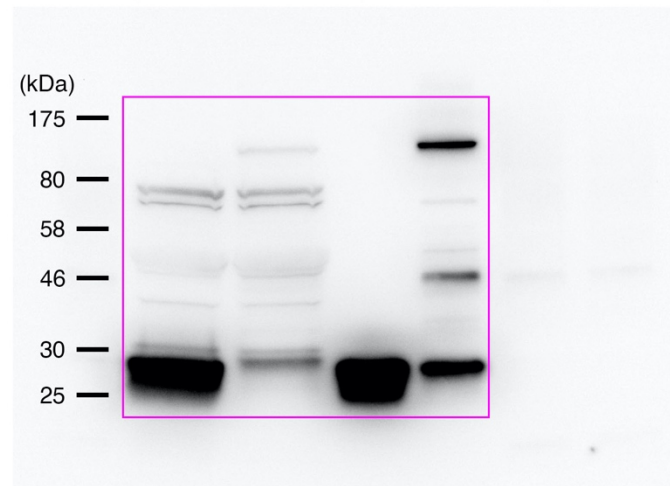

Fig. S7. Full blots.

**Table S1.** Nucleotide primers used in this study

| <b>Genotyping</b>                 |                                                                                                 |                                                                                                                                                                                                                                                            |
|-----------------------------------|-------------------------------------------------------------------------------------------------|------------------------------------------------------------------------------------------------------------------------------------------------------------------------------------------------------------------------------------------------------------|
| PICALM1a                          | At2g01600-1 for<br>At2g01600-1 rev<br>LBb1-2                                                    | CTGATCCTCCAACTCCTCATTTTGG<br>TCAAATGAGGCCAGTGCTACGGA<br>GACCGCTTGCTGCAACTCTCTCA                                                                                                                                                                            |
| PICALM1b                          | 026 G05 for2<br>026 G05 rev2<br>LB(GABI)                                                        | TGGTACATTAAACTAAACTCGGGG<br>TCATCAGGCGTATAGGTCAGAAG<br>cccatttgacgtgaatgtagacac                                                                                                                                                                            |
| <b>Plasmid construction</b>       |                                                                                                 |                                                                                                                                                                                                                                                            |
| PICALM1a genomic / pENTR/D-TOPO   | A7g TP fw<br>ANTH7 del stop rv                                                                  | caccCAGTGGCCAATTTACGTAGTTAGTG<br>AATGAGGCCAGTGCTACGGAAC                                                                                                                                                                                                    |
| PICALM1a genomic sequence         | A7g s1f<br>A7g s2f<br>A7g s3f<br>A7g s4f<br>A7g s5f<br>A7g s6f<br>A7g s7f                       | CGGACAGATATTAAGCCATGAATG<br>GCGAATACGCCGTACGCTCTC<br>CTCCTTCATTTGTGGGTATATGTG<br>CACAACGGACACAGTCGGTG<br>CTTTTCTGACAACAATGGAGGAG<br>CTGATCTCTGTGTTTCCAGCTG<br>TGTCTACGGTGCACCAGCTC                                                                         |
| PICALM1b genomic / pENTR/D-TOPO   | ANTH8 pro TOPO fw<br>ANTH8 ORF rvG 2                                                            | CACCctctctccatagactccgacg<br>CAAGAAGCCCGTGCTGCCGAAGGGGTTGTTGCTGTTATG                                                                                                                                                                                       |
| PICALM1b genomic sequence         | A8g sf1<br>A8g sf2<br>A8g sf3<br>A8g sf4<br>A8g sf5<br>A8g sf6<br>A8g sf7<br>A8g sf8<br>A8g sf9 | gaattgggcttgatccatac<br>ctaatcaaagttatatattggacgctag<br>ggaaagaaatataagaatgagacg<br>GCGATTAGGCCTCGAGCAGATGTTG<br>CACTTATGCGTTGTTTCTTGAG<br>cataattacatatatccgctag<br>GCAAAGGATTAGAAGTTGCAAGG<br>gtctctgattctctcagtattacacacag<br>CAATCCGTTTGAGGTCCAAGACCTG |
| mRFP-CESA2 genomic / pENTR/D-TOPO | CACC-pCESA2 f.<br>CESA2 genomic r.<br>linker-CESA2 f.                                           | caccGACAGATTGTGAGTGCGAAACACACATA<br>AGCCGTTTCGATCAGGTTAAG<br>GGAGGTAGTGGCGGCAACTACTGGTGGTCCGGCTCAT                                                                                                                                                         |

|                        |                                                                                |                                                                                                                                            |
|------------------------|--------------------------------------------------------------------------------|--------------------------------------------------------------------------------------------------------------------------------------------|
|                        | pCESA2-mRFP r.<br>mRFP f.<br>mRFP-linker r.                                    | CTCGGAGGAGGCCATGATGTCTTCTACACCGA<br>ATGGCCTCCTCCGAGGACGT<br>GCCGCCACTACCTCCTCCGGCGCCGGTGGAGTGGCGGC                                         |
| CESA2 genomic sequence | CESA2 seq1<br>CESA2 seq2r.<br>CESA2 seq3<br>CESA2 seq4<br>CESA2 seq5           | ACTCTTACTAGTGCATGCT<br>GTAAACACATACGAGGTGCAG<br>GGGAACGTCGTGCTATGAA<br>TATGTGTTTCATGATGGACC<br>TTTGGTTTCTGTCTTGTGA                         |
| <b>Y2H Screening</b>   |                                                                                |                                                                                                                                            |
| Library sequence       | M5ADLD_scr_amp<br>M3_ins_scr_amp<br>T7_seq_primer                              | ctattcgatgatgaagatacccccaccaaaccacaaaaaagag<br>AGTGAACCTTGC GGGGTTTTTCAGTATCTACGAT<br>aatacgactcactatagggc                                 |
| VAMP721 / pGBKT7       | VAMP721 fw for pGBKT7<br>VAMP721SN rv for pGBKT7                               | CATGGAGGCCGAATTCATGGCGCAACAATCGTTGATC<br>GCAGGTGCACGGATCCTCACATGTTCTGAAGCCACATCTTTC                                                        |
| VAMP727 / pGBKT7       | 727 fw for pGBKT7<br>727 SN rv for pGBKT7                                      | CATGGAGGCCGAATTCATGAGTCAAAAGGGTTTGATATATAGC<br>GCAGGTGCACGGATCCTCACAGACTCTGTAGCCACATCTTC                                                   |
| sequence               | pGBKT7 sf<br>pGBKT7 sr<br>pGADT7 sf<br>pGADT7 sr                               | GAAGAGAGTAGTAACAAAGGTC<br>CGGAATTAGCTTGGCTGCAAG<br>CTATTCGATGATGAAGATACCCAC<br>AGATGGTGCACGATGCACAG                                        |
| <b>Y2H assay</b>       |                                                                                |                                                                                                                                            |
| VAMP721 / pENTR/D-TOPO | VAMP721 ORF TOPO fw2<br>VAMP721 SN TOPO fw<br>VAMP721 SN rv<br>AtVAMP721 LD rv | caccATGGCGCAACAATCGTTGATCTACAGTTTCGTAGCTCGCG<br>caccCATCCTGATGAGATTAGCAAG<br>TCACATGTTCTGAAGCCACATCTTCTTCTC<br>TTAATCCATGCAATACTGCATATGCTC |
| VAMP727 / pENTR/D-TOPO | VAMP727 ORF TOPO fw2<br>727 SN rv<br>727 SN topo fw<br>727 LD rv               | caccATGAGTCAAAAGGGTTTGATATATAGC<br>TCACAGACTCTGTAGCCACATCTTC<br>caccCATCCAGAAGAGATGAGCAAACCTTTC<br>TCAGCTCATAACAATACTGCATATGCTC            |
| VAMP713 / pENTR/D-TOPO | TPAt713Fw<br>TPAt713-TMDRv                                                     | caccATGGCGATCATATTTGCGTTG<br>TTATGTAAGCTTGACATTTCTC                                                                                        |
| EPSIN1 / pENTR/D-TOPO  | At5g11710 topo fw                                                              | caccATGGATTTTCATGAAGGTCTTCGATC                                                                                                             |

|                              |                                                                                        |                                                                                                                                                                                                                                     |
|------------------------------|----------------------------------------------------------------------------------------|-------------------------------------------------------------------------------------------------------------------------------------------------------------------------------------------------------------------------------------|
|                              | At5g11710 rv                                                                           | TCACTGCTTAAAGCCACCAGATTG                                                                                                                                                                                                            |
| EPSIN2 / pENTR/D-TOPO        | AT2G43160 TOPO fw<br>AT2G43160 rv                                                      | caccATGAAGAAAGTCTTCGGACAAACTG<br>TTACCGGTATCCACCACCATAGGATTGTTG                                                                                                                                                                     |
| EPSIN3 / pENTR/D-TOPO        | At3g59290 topo fw<br>At3g59290 rv                                                      | caccATGAAGAAAGCATTGGTCAAACCTG<br>TTACCGGTAACCTCCACCATATGG                                                                                                                                                                           |
| PICALM5a/ECA2 / pENTR/D-TOPO | At1g03050 topo fw<br>At1g03050 rv                                                      | caccATGGGTTTCGAGTAAGTTTAAACGAG<br>TCAATATTGAGGTGTGTAAGAGTAAGGTTG                                                                                                                                                                    |
| PICALM5b / pENTR/D-TOPO      | At4g02650 topo fw<br>At4g02650 rv                                                      | caccATGGGTTCAAGTAAGCTAAAACGTG<br>TCAATAGCGAGGCGTGTAAGAG                                                                                                                                                                             |
| PICALM4a/ECA4 / pENTR/D-TOPO | At2g25430 topo fw<br>At2g25430 rv                                                      | caccATGGCTCCGAGTATTCGAAAAGC<br>TCAGTAAGGATTGTTGTAGTAATACCCCG                                                                                                                                                                        |
| PICALM6/AP180 / pENTR/D-TOPO | At1g05020 topo fw<br>At1g05020 rv                                                      | caccATGCCGAGCAAGCTTAAAAAAGC<br>TCAACTCAAGTGCTTGGCTATGATC                                                                                                                                                                            |
| PICALM3 / pENTR/D-TOPO       | At5g35200 topo fw<br>At5g35200 rv                                                      | caccATGTCAGGTGGTGGTGGATC<br>TTACATATACCTTGGATATGGGTTGTAAC                                                                                                                                                                           |
| PICALM2b / pENTR/D-TOPO      | At4g25940 topo fw<br>At4g25940 rv                                                      | caccATGGCAACGTTTAAACAGCTTCC<br>CTAGAGGAGCATATGATGATGGTTG                                                                                                                                                                            |
| PICALM1a / pENTR/D-TOPO      | AT2G01600 TOPO fw<br>AT2G01600 rv                                                      | caccATGGGAACGCTACAGTCATGG<br>TCAAATGAGGCCAGTGCTACG                                                                                                                                                                                  |
| PICALM1b / pENTR/D-TOPO      | At1g14910 topo fw<br>At1g14910 rv                                                      | caccATGGGAACGCTACAGTCATGG<br>TCACAAGAAGCCCGTGCTGC                                                                                                                                                                                   |
| PICALM2a / pENTR/D-TOPO      | ANTH10_TOPO_fw_3<br>ANTH10_TOPO_rv_3                                                   | caccATGGGAACGTTACGAGCTTTCGAAAAGCCTATG<br>CTAGAGAAGCATATGATTAGGACTGTATTGCTGCTGTGTA                                                                                                                                                   |
| Sequencing                   | E1 s1f<br>E1 s2f<br>E2 s1f<br>E2 s2f<br>E2 s3f<br>E2 s4f<br>E3 s1f<br>E3 s2f<br>E3 s3f | CTGGTTCCTCAGCTTCATTTG<br>AGCTCCTCCGACGGTTGATC<br>GATTACGGAAGCCGGGATGAAG<br>CTCAGAAAGTTGAGACTTTCGATG<br>GCTACATCTCAGAGTGGTATTG<br>TCATCAGTCTGGGCAGACAC<br>CCGCTATGGAGACAGAGATG<br>GAATCATCTCCTCAGCAAGTTGAG<br>CACCGAACTTATCCGTCTTTCC |

|               |             |                              |
|---------------|-------------|------------------------------|
|               | E3 s4f      | GACACAGCAACCTTATGGTGTG       |
|               | E3 s5f      | CAAATCCATTGGCGGATATAGGAG     |
|               | A1 s1f      | TCTCCACGGCTATCGTGGTC         |
|               | A1 s2f      | GATATGAACGCAATAAAGGCCTTAC    |
|               | A2 s1f      | GGAAGATGATCATCGAGGGAC        |
|               | A2 s2f      | CAAATCTGAGGAGGAGGAGAGC       |
|               | A3 s1f      | AGAGATGATTTAGGTCTCCAC        |
|               | A3 s2f      | GTGTGGCGAGATCGTCTGAG         |
|               | A3 s3f      | CAGACAGCCGCTTTGGGTG          |
|               | A4 s1f      | CAGCACCAACTCAACAACAAG        |
|               | A4 s2f      | CCACGATTGATACGTCCGAG         |
|               | A5 s1f      | GCACTCCTGATTTGCTCGAG         |
|               | A5 s2f      | CAGAAGCAGAGAAGCCTGTAG        |
|               | A6 s1f      | CAAGGATGCTCTCCGATGAAG        |
|               | A6 s2f      | CCAGCCGCTTATCGAAGAAG         |
|               | A7 orf s1   | CTTGAGGAACGGCTTGAATGCTTC     |
|               | A7 orf s2   | GGCCGGATGATGGACTGACTACCG     |
|               | A7 orf s3   | GAGGGTTAGATACGCTTACACTTAGCAG |
|               | A8 s1f      | AAACTCTTGGAACAGTTGCCAG       |
|               | A8 s2f      | TCCCAGTCTCCTCCTTCAGTAG       |
|               | A8 s3f      | GCCACAGCTACAGGTTGCAC         |
|               | ANTH10_sf1  | AGAAGAGCGGCTTGAATGTTATC      |
|               | ANTH10_sf2  | AGTACATTAAGAAGCGCCTC         |
|               | ANTH10_sf3  | ACAACAATCCTCGTCCCGTTATAG     |
| <b>RT-PCR</b> |             |                              |
| PICALM1a      | ANTH7 RT fw | ATGGGAACGCTACAGTCATGGAG      |
|               | ANTH7 RT rv | TCAAATGAGGCCAGTGCTACGG       |
| PICALM1b      | ANTH8 RT fw | ATGGGAACGCTACAGTCATGGC       |
|               | ANTH8 RT rv | TCACAAGAAGCCCGTGCTGC         |
| TUA6          | TUA6 RT fw  | ATGAGAGAGTGCATTTGATCCAC      |
|               | TUA6 RT rv  | TTAGTATTCCTCCTTCATCATCCTCATC |
